# Supplementary material
Source: PubMed Central journal article supplement (PMC4188265)

Supporting Information for:

# Identification of Amino Acid Epimerization and Isomerization in Crystallin Proteins by Tandem

## LC-MS

*Yuanqi Tao\**, *Ryan R. Julian†*

\* Department of Chemistry, University of California, Riverside, California, 92521

† Ryan R. Julian, Department of Chemistry, University of California, Riverside, California,  
92521, (951) 827-3958, [ryan.julian@ucr.edu](mailto:ryan.julian@ucr.edu)

Content:

Table S1. Source ions for R and S values

Table S2. Other identified proteins predicted to be crystallins from the ovis aries database

Figure S1-S6. Additional supporting data.

Table S1. Source ions for R and S values

R Value for CID

| Peptide      | Fragment 1 | Fragment 2 | R value |
|--------------|------------|------------|---------|
| RGYALG       | $a_5^+$    | -17        | 1.13    |
| MEHFRW       | $b_3^+$    | -17        | 1.20    |
| LVFFAEDVGSNK | $b_{10}^+$ | $b_5^+$    | 1.88    |
| RPPGFSPFR    | $b_6^+$    | -17        | 1.55    |
| PHCKRM       | $b_5^+$    | $y_4^+$    | 1.27    |
| RYLPT        | $b_2^+$    | -17        | 1.35    |

R value for RDD

| Peptide      | Fragment 1    | Fragment 2 | R value |
|--------------|---------------|------------|---------|
| LDLAGR       | -56L          | -43L       | 1.22    |
| IQTGLDATHAER | -72E          | -18        | 1.70    |
| DAEFR        | $y_4^+$       | -59E       | 1.18    |
| HGPLGPL      | -56L          | -43L       | 1.21    |
| NGPLQAGQPGER | $y_{11}^{2+}$ | -18        | 2.01    |
| PSKYEPFV     | $b_5^{+}$     | $y_7^{+}$  | 2..31   |

S value for CID

| Peptide                | Fragment 1 | Fragment 2 | R value |
|------------------------|------------|------------|---------|
| TVLDSGISEVR (L-Asp)    | $b_2^+$    | $y_6^+$    | 1.63    |
| TVLDSGISEVR (D-isoAsp) | $y_4^+$    | $y_8^+$    | 1.13    |
| TVLDSGISEVR (D-Asp)    | $y_4^+$    | $y_5^+$    | 1.58    |
| TVLDSGISEVR (isoAsp)   | $y_6^+$    | -18        | 1.62    |
| TVLDSGISEVR (L-Asp)    | $b_2^+$    | $y_9^{2+}$ | 1.72    |
| TVLDSGISEVR (isoAsp)   | $y_8^+$    | -18        | 1.22    |

S value for RDD

| Peptide                | Fragment 1       | Fragment 2         | R value |
|------------------------|------------------|--------------------|---------|
| TVLDSGISEVR (isoAsp)   | $y_9^{\bullet+}$ | $y_6^{\bullet+}$   | 2.38    |
| TVLDSGISEVR (L-Asp)    | $b_5^+$          | $y_3^{\bullet+}$   | 2.02    |
| TVLDSGISEVR (D-isoAsp) | $b_5^+$          | $y_9^{\bullet+}$   | 2.22    |
| TVLDSGISEVR (D-Asp)    | $y_9^{\bullet+}$ | $y_9^{\bullet 2+}$ | 3.21    |
| TVLDSGISEVR (iso-Asp)  | $b_3^{\bullet+}$ | $y_2^+$            | 2.07    |
| TVLDSGISEVR (L-Asp)    | $b_6^+$          | $b_4^{\bullet+}$   | 2.70    |

Table S2. Other identified proteins predicted to be crystallins from the *ovis aries* database (UniProt 2014 06, 26,849 entries)

| UniprotKB Acession Number | Gene Name | Sequence Coverage % | Unique Peptides Detected | Log (E) |
|---------------------------|-----------|---------------------|--------------------------|---------|
| W5P9A5                    | CRYBA1    | 92.6%               | 12                       | -506.4  |
| W5NUB1                    | CRYBA4    | 53.9%               | 9                        | -383.0  |
| W5QCG5                    | CRYBB2    | 71.6%               | 9                        | -334.9  |
| W5QC77                    | CRYGB     | 58.9%               | 6                        | -304.3  |
| W5NTX9                    | CRYBB1    | 49.2%               | 9                        | -260.1  |
| W5QH67                    | CRYGS     | 66.3%               | 7                        | -217.3  |
| W5PSF8                    | CRYZ      | 50%                 | 9                        | -197.9  |
| W5QC70                    | CRYGC     | 24.1%               | 3                        | -145.3  |
| W5QCA3                    | CRYGA     | 37.4%               | 4                        | -119.9  |
| W5QET5                    | CRYBA2    | 6.6%                | 1                        | -16.4   |

Figure S1 (a) LC chromatogram for peptide TVLDSGISEVR in sheep eye crystallin digestion mixture.

(b) CID of  $[\text{TVLDSGISEVR} + 2\text{H}]^{2+}$  at 24.76min, 26.59min, 28.53min separately. The red stars represent fragments from a co-eluting peptide HFSPEDLTVK.

The peptide eluting at 24.76 minute has the  $S_{\text{CID}}$  value of 30, 1.3, 6.7, 2.1 comparing to L-Asp, L-isoAsp, D-Asp, D-isoAsp containing synthetic peptides;

The peptide eluting at 26.59 min has the  $S_{\text{CID}}$  value of 2.7, 13, 3.5, 3.9 comparing to L-Asp, L-isoAsp, D-Asp, D-isoAsp containing synthetic peptides

The peptide eluting at 28.53 min has the  $S_{\text{CID}}$  value of 4.8, 10, 2.1, 5.2 comparing to L-Asp, L-isoAsp, D-Asp, D-isoAsp containing synthetic peptides

The spectra at 24.76min and 28.53min are identified as L-isoAsp and D-Asp containing peptide.

The peptide eluting at 26.59 minutes does not match any of the isomers, indicating that potentially the serine residue is also epimerized or that the remaining two Asp isomers are co-eluting.

(c) CID spectra of four synthetic peptides L-Asp, D-Asp, L-isoAsp, and D-isoAsp TVLDSGISEVR.

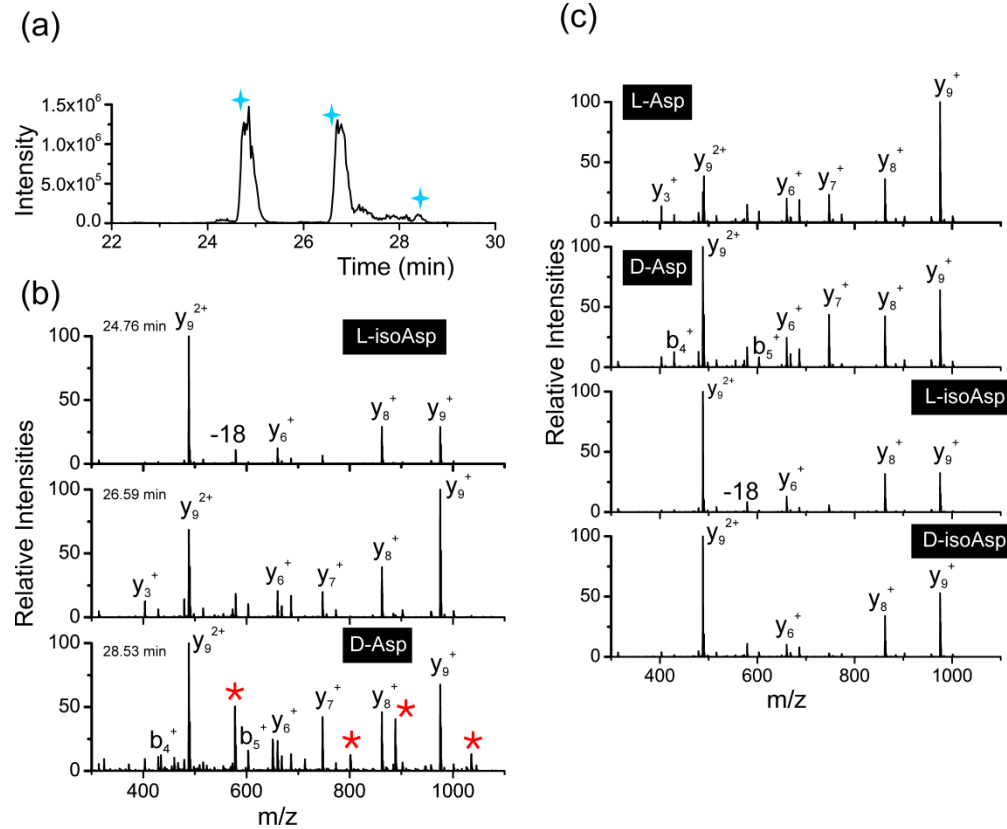

Figure S2. (a) LC chromatogram for peptide  $^1\text{TVLDSGISEVR}$  in sheep eye crystallin digestion mixture after modification.

(b) RDD spectra of  $[\text{}^1\text{TVLDSGISEVR} + 2\text{H}]^{2+}$  at 64.68min, 67.57min, 70.44min separately. The red stars represent fragments from a co-eluting peptide.

The peptide eluting at 64.68 minute has the  $S_{\text{RDD}}$  value of 40, 2.6, 59, 20, comparing to L-Asp, L-isoAsp, D-Asp, D-isoAsp containing synthetic peptides.

The peptide eluting at 67.57 min has the S value of 62, 16, 79, 2.4 comparing to L-Asp, L-isoAsp, D-Asp, D-isoAsp containing synthetic peptides

The peptide eluting at 70.44 min has the  $S_{\text{RDD}}$  value of 3.1, 25, 6.7, 43, comparing to L-Asp, L-isoAsp, D-Asp, D-isoAsp containing synthetic peptides.

The three spectra are identified as L-isoAsp, D-isoAsp, and L- Asp containing peptide ( $S_{\text{RDD}} < 3.2$ ). Since RDD provides much higher values than CID, the identification is clear in RDD.

(c) RDD spectra of four synthetic peptides L-Asp, D- Asp, L-isoAsp, and D-isoAsp  $^1\text{TVLDSGISEVR}$ .

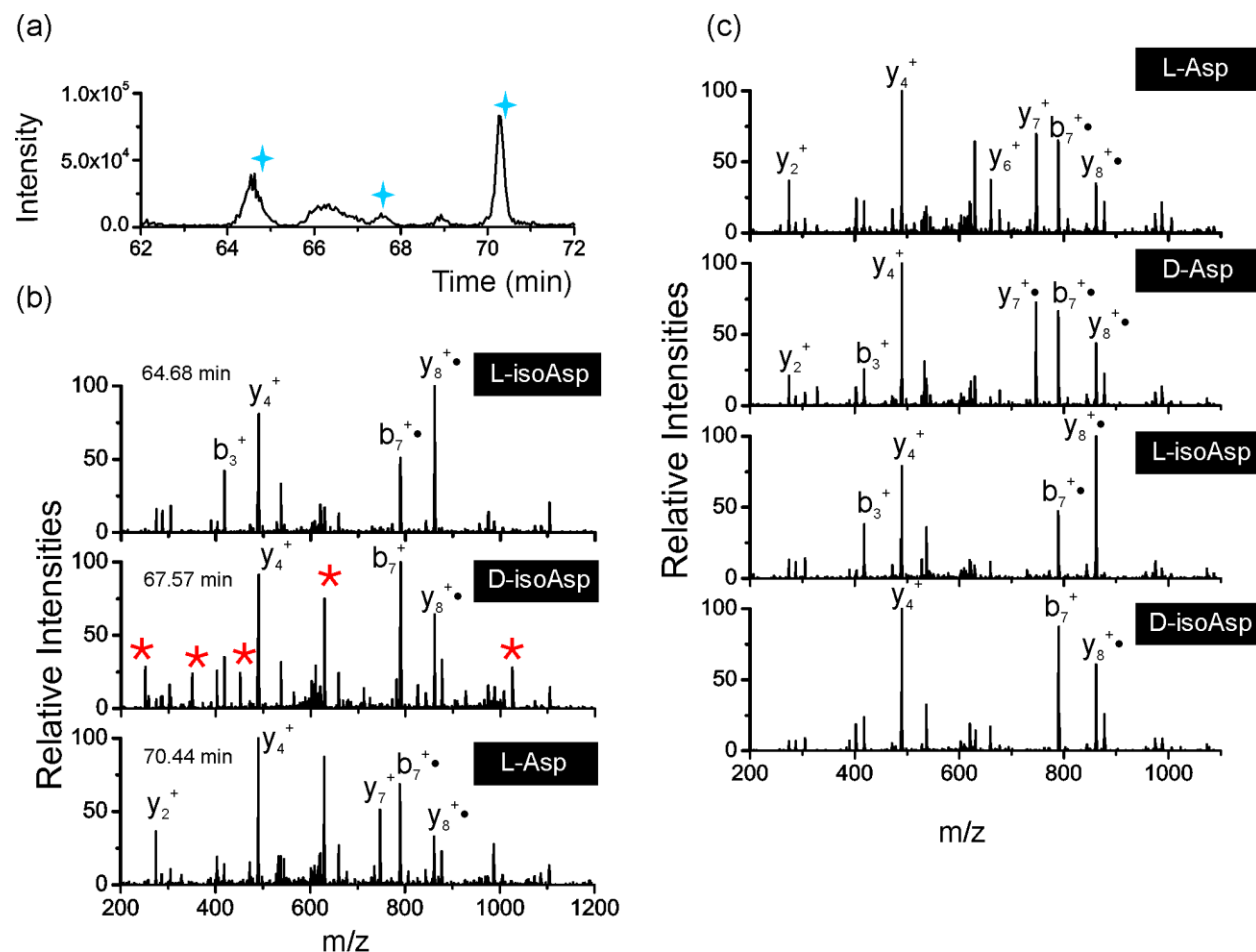

Figure S3. (a) LC chromatogram for peptide HFSPEDLTVK in sheep eye crystallin digestion mixture. (b) CID of  $[\text{HFSPEDLTVK} + 2\text{H}]^{2+}$  at 32.44min and 35.39min, separately. The  $R_{\text{isomer}}$  value is 1.5 ( $y_9^+$  & -18). (c) CID of  $[\text{HFSPEDLTVK} + \text{H}]^+$  at 32.64min and 35.53min, separately. The  $R_{\text{isomer}}$  value is 7.3 ( $b_8^+$  &  $y_5^+$ ). (d) LC chromatogram for peptide  $^1\text{HFSPEDLTVK}$  in sheep eye crystallin digestion mixture after modification. (e) RDD of  $[\text{HFSPEDLTV}^1\text{K} + 2\text{H}]^{2+}$  at 61.97min and 66.25min, separately. The  $R_{\text{isomer}}$  value is 25.3 ( $y_6^+$  &  $y_4^+$ ).

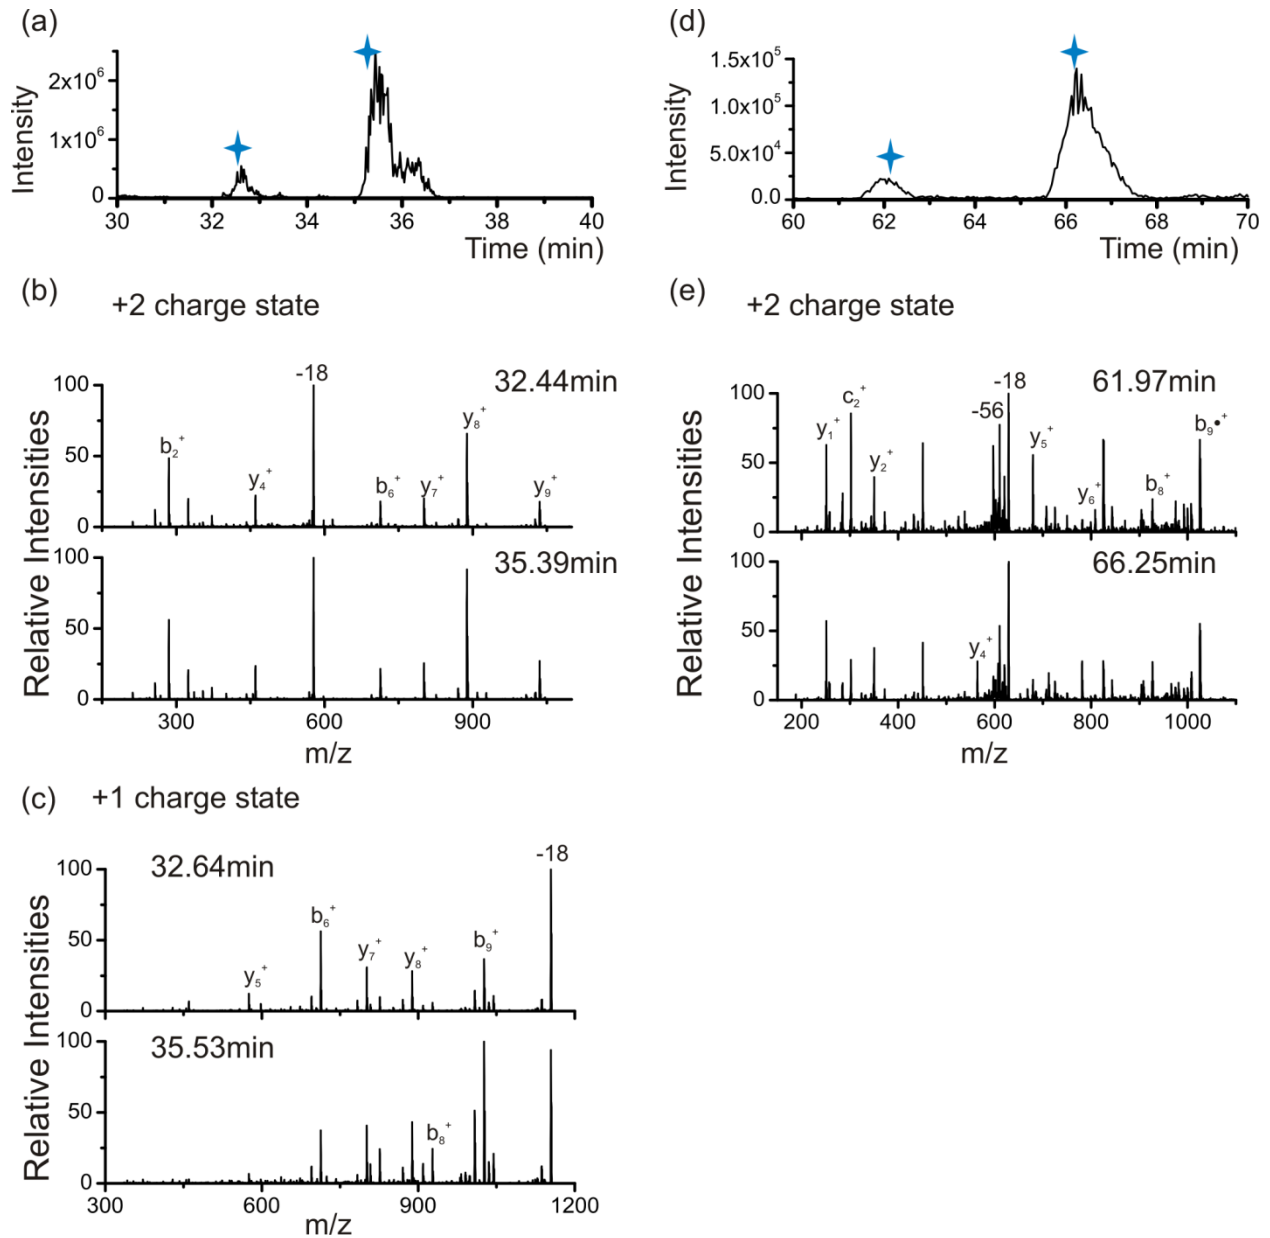

Figure S4. (a) LC chromatogram for peptide Ac-AEQHSAPEQAAAGK in sheep eye crystallin digestion mixture (b) CID spectra of  $[\text{Ac-AEQHSAPEQAAAGK} + 2\text{H}]^{2+}$  at 22.18min and 22.48min, separately. The two spectra are identified as L-serine and D-serine containing peptide by comparing with (c). (c) CID spectra of two synthetic peptides L-serine and D-serine Ac-AEQHSAPEQAAAGK.

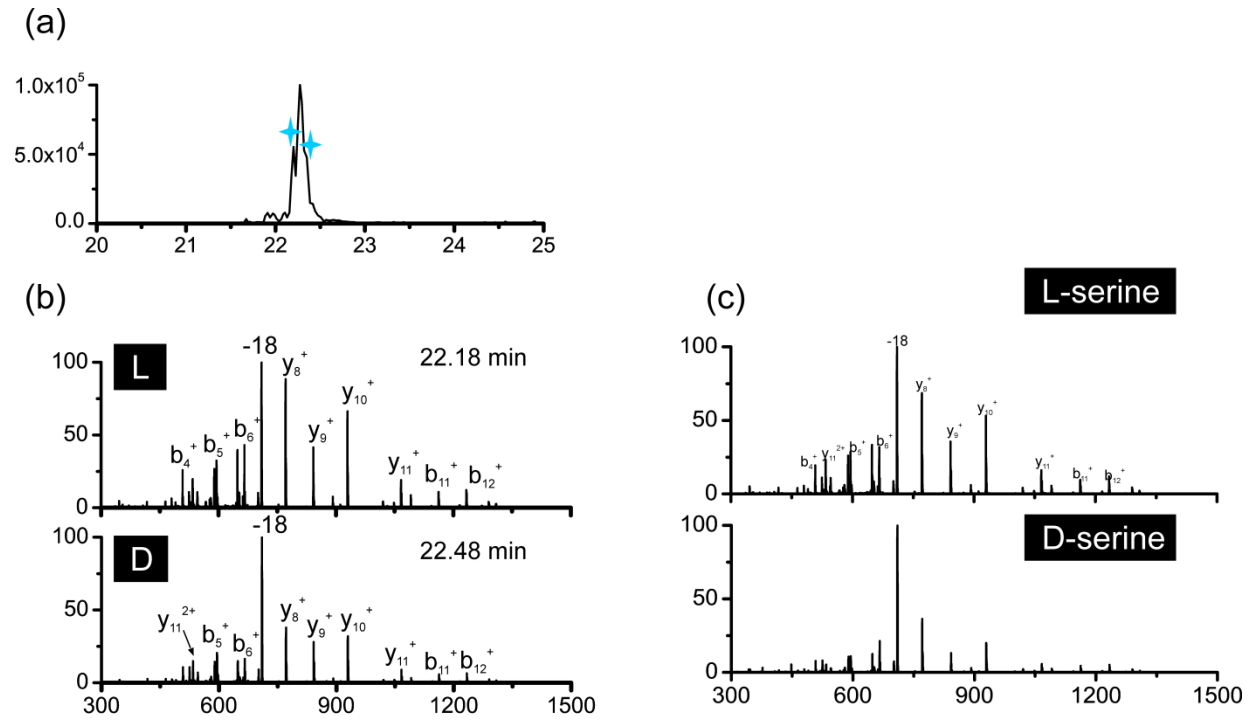



Figure S5. (a) LC chromatogram for peptide LFDQFFGEGLEFYDLLPFLSSTISPYR in sheep eye crystallin digestion mixture. (b) CID of  $[LFDQFFGEGLEFYDLLPFLSSTISPYR + 3H]^{3+}$  at 84.02min, 84.89min, and 86.06min, separately. The  $R_{\text{isomer}}$  value is 5.3 for 84.02min and 84.49min ( $y_4^+$  &  $y_{13}^{2+}$ ), 2.3 for 84.02min and 86.06min ( $b_{15}^+$  &  $b_{16}^+$ ), 2.1 for 84.89min and 86.06min ( $y_5^+$  &  $b_{12}^+$ ).

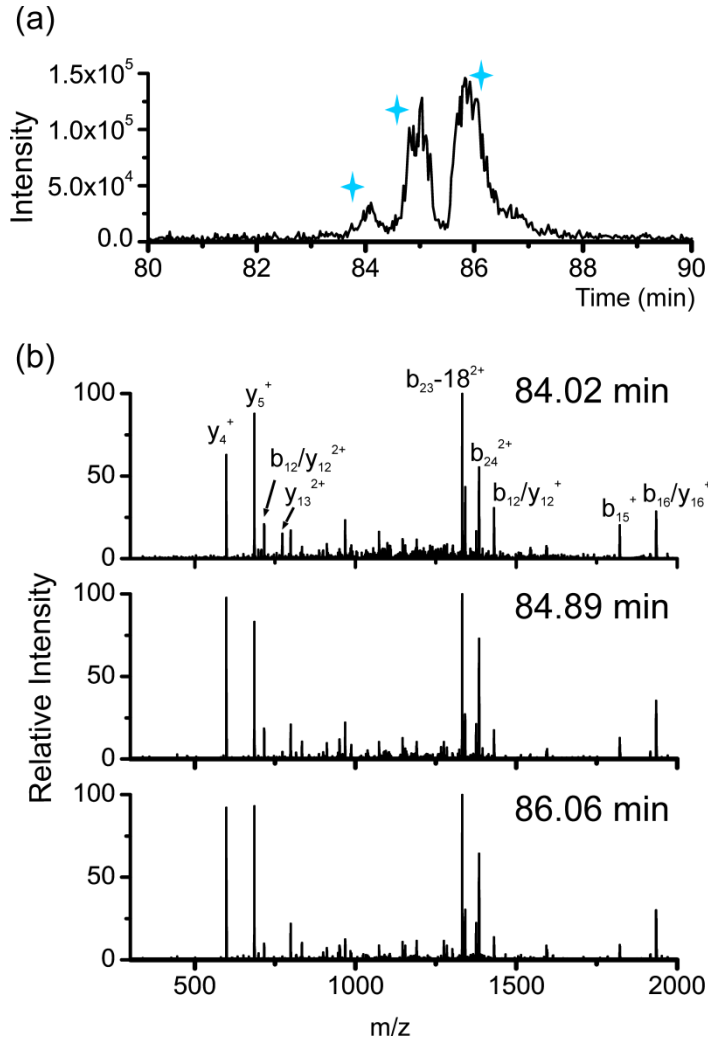

Figure S6. (a) LC chromatogram for peptide QDEHGFISR (N-terminal glutamine cyclized) in sheep eye crystallin digestion mixture. (b) CID of  $[\text{QDEHGFISR} + 2\text{H}]^{2+}$  at 27.98min and 30.68min, separately. The  $R_{\text{isomer}}$  value is 2.8 ( $b_7^+$  &  $y_6^+$ ).

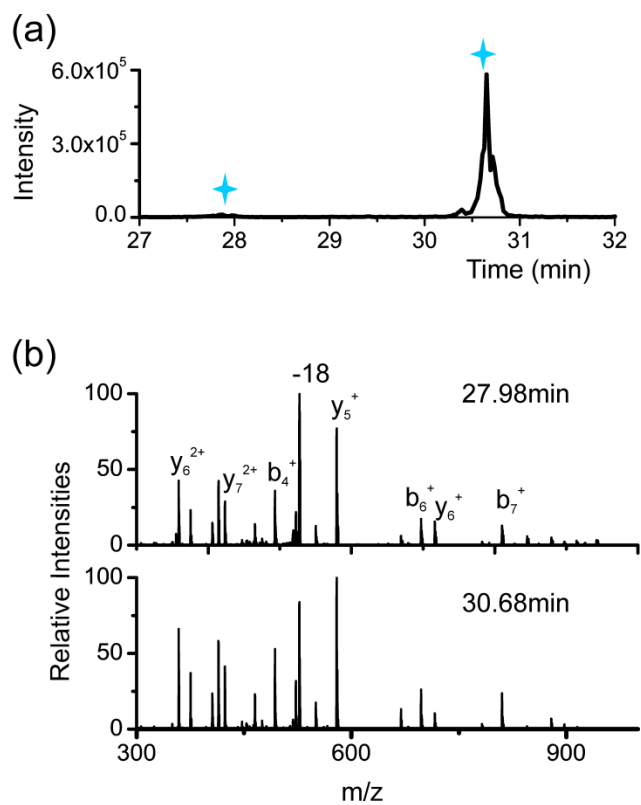

Supplement: ac502296c_si_001.pdf [file ac502296c_si_001.pdf]
